# Supplementary material for: Mesoporous Dual-Semiconductor ZnS/CdS Nanocomposites as Efficient Visible Light Photocatalysts for Hydrogen Generation
Source: MDPI journal article supplement (doi:10.3390/nano13172426), 2023-08-26
Supplement: s1 [file s1]

## Supplementary Materials

# **Mesoporous Dual-Semiconductor ZnS/CdS Nanocomposites as Efficient Visible Light Photocatalysts for Hydrogen Generation**

**Ioannis Vamvasakis <sup>1,\*</sup>, Evangelos K. Andreou <sup>1</sup> and Gerasimos S. Armatas <sup>1</sup>**

<sup>1</sup> University of Crete, Department of Materials Science and Technology, 70013 Voutes, Heraklion, Greece.

\* Correspondence: j.vamvasakis@gmail.com; Tel.: 0030-2810-545119.

## Supporting Tables

**Table S1.** Chemical composition of the as-prepared mesoporous CdS and ZnS NCAs, along with the mesoporous ZnS/CdS nanocomposites with different ZnS content, according to EDS analysis. The EDS results for the reference materials ZnS/CdS bulk and RNAs with 50 wt.% ZnS content are also shown.

| Sample                     | Cd<br>(at.%) | Zn<br>(at.%) | S<br>(at.%)  | ZnS content <sup>1</sup><br>(wt.%) |
|----------------------------|--------------|--------------|--------------|------------------------------------|
| CdS NCAs                   | 50.73 ± 0.25 | 0            | 49.27 ± 0.25 | 0                                  |
| 10-ZnS/CdS                 | 43.16 ± 0.49 | 7.08 ± 0.40  | 49.76 ± 0.58 | 9.96 ± 0.23                        |
| 30-ZnS/CdS                 | 27.24 ± 0.15 | 16.93 ± 0.71 | 55.83 ± 0.67 | 29.54 ± 0.44                       |
| 50-ZnS/CdS                 | 17.67 ± 0.19 | 26.58 ± 0.65 | 55.75 ± 0.51 | 50.37 ± 0.20                       |
| 70-ZnS/CdS                 | 9.62 ± 0.19  | 34.76 ± 0.59 | 55.62 ± 0.57 | 70.91 ± 0.03                       |
| 90-ZnS/CdS                 | 4.03 ± 0.17  | 46.81 ± 0.91 | 49.16 ± 0.55 | 88.70 ± 0.13                       |
| ZnS NCAs                   | 0            | 53.65 ± 0.33 | 46.35 ± 0.33 | 100                                |
| ZnS/CdS bulk <sup>2</sup>  | 21.11 ± 0.51 | 31.31 ± 1.28 | 47.58 ± 0.92 | 50.02 ± 0.24                       |
| ZnS/CdS RNAs <sup>3</sup>  | 17.93 ± 0.10 | 26.39 ± 0.40 | 55.68 ± 0.39 | 49.82 ± 0.14                       |
| 50-ZnS/CdS AC <sup>4</sup> | 15.62 ± 0.26 | 23.42 ± 0.60 | 60.96 ± 0.30 | 50.29 ± 0.10                       |
| 50-ZnS/CdS-c <sup>5</sup>  | 17.47 ± 0.21 | 31.83 ± 0.53 | 50.70 ± 0.52 | 55.14 ± 0.11                       |

<sup>1</sup> As determined on the basis of the EDS Zn and Cd atomic ratios. <sup>2</sup> EDS results for the ZnS/CdS bulk reference sample (50 wt.% ZnS). <sup>3</sup> EDS results for the reference material ZnS/CdS RNAs (RNAs: random NC-aggregates) with 50 wt.% ZnS, synthesized through a template-free oxidative coupling of ZnS and CdS NCs. <sup>4</sup> EDS results for the 50-ZnS/CdS catalyst retrieved after 24 h of photocatalytic stability test (reaction conditions: 20 mg of catalyst dispersed in a 1.4 M Na<sub>2</sub>S and 1.0 M Na<sub>2</sub>SO<sub>3</sub> aqueous electrolyte, irradiated with visible light using a 300 W Xe light with a cut-off filter allowing  $\lambda \geq 420$  nm). <sup>5</sup> EDS results for the 50-ZnS/CdS catalyst retrieved after the photocatalytic corrosion experiment with triethanolamine (TEOA) as hole scavenger (reaction conditions: 20 mg of catalyst dispersed in aqueous solution containing 10% v/v TEOA, irradiated for 3 h under visible light using a 300 W Xe light with a cut-off filter allowing  $\lambda \geq 420$  nm).

**Table S2.** Comparison of H<sub>2</sub>-production activities between mesoporous 50-ZnS/CdS and other reported CdZnS-based photocatalysts.

| Sample                                      | Reaction conditions                                                                               | Light source                              | H <sub>2</sub> evolution rate<br>(mmol g <sup>-1</sup> h <sup>-1</sup> ) | Apparent quantum yield<br>(AQY) | Ref. |
|---------------------------------------------|---------------------------------------------------------------------------------------------------|-------------------------------------------|--------------------------------------------------------------------------|---------------------------------|------|
| ZnS/Zn <sub>1-x</sub> Cd <sub>x</sub> S/CdS | 5 mg catalyst<br>0.35 M Na <sub>2</sub> S &<br>0.25 M Na <sub>2</sub> SO <sub>3</sub><br>(100 mL) | 300 W<br>Xe lamp<br>$\lambda \geq 420$ nm | 106.5                                                                    | -                               | [1]  |

|                                                                    |                                                                                                     |                                           |                                                  |                   |      |
|--------------------------------------------------------------------|-----------------------------------------------------------------------------------------------------|-------------------------------------------|--------------------------------------------------|-------------------|------|
| CdS/ZnS nanorods                                                   | 1 mg catalyst<br>0.75 M Na <sub>2</sub> S &<br>1.05 M Na <sub>2</sub> SO <sub>3</sub><br>(20 mL)    | 300 W<br>Xe lamp<br>$\lambda \geq 420$ nm | 239<br>( $\mu\text{mol h}^{-1} \text{mg}^{-1}$ ) | 16.8%<br>(420 nm) | [2]  |
| 0.5%Ru/(CdS) <sub>0.8</sub> /(ZnS) <sub>0.2</sub><br>nanoparticles | 150 mg catalyst<br>0.1 M Na <sub>2</sub> S &<br>0.2 M Na <sub>2</sub> SO <sub>3</sub><br>(150 mL)   | 300 W<br>Xe lamp<br>$\lambda \geq 420$ nm | 12.65                                            | -                 | [3]  |
| Pt-ZnS/CdS<br>2D/1D nanocomposites                                 | 50 mg catalyst<br>~10% v/v lactic acid<br>(230 mL)                                                  | 300 W<br>Xe lamp<br>$\lambda > 400$ nm    | 26                                               | 5.7%<br>(420 nm)  | [4]  |
| (CdS) <sub>0.4</sub> /(ZnS) <sub>0.6</sub>                         | 50 mg catalyst<br>0.1 M Na <sub>2</sub> S &<br>0.1 M Na <sub>2</sub> SO <sub>3</sub><br>(100 mL)    | 300 W<br>Xe lamp<br>$\lambda \geq 420$ nm | 0.83                                             | -                 | [5]  |
| Zn/Cd-MOF derived<br>ZnS/CdS heterojunction                        | 20 mg catalyst<br>35 mM Na <sub>2</sub> S &<br>18 mM Na <sub>2</sub> SO <sub>3</sub><br>(100 mL)    | 300 W<br>Xe lamp<br>$\lambda \geq 420$ nm | 2.35                                             | 3.92%<br>(420 nm) | [6]  |
| Pt-PdS-CdS/ZnS<br>core/shell NCs                                   | 1.5 mg catalyst<br>0.1 M Na <sub>2</sub> S<br>(50 mL)                                               | 300 W<br>Xe lamp<br>$\lambda \geq 380$ nm | ~50                                              | -                 | [7]  |
| PdS-CdS/ZnS<br>core/shell particles                                | 100 mg catalyst<br>0.1 M Na <sub>2</sub> S &<br>0.1 M Na <sub>2</sub> SO <sub>3</sub><br>(270 mL)   | 300 W<br>Xe lamp<br>$\lambda \geq 400$ nm | 2.08                                             | -                 | [8]  |
| CdS/ZnS core/shell<br>nanorods                                     | 10 mg catalyst<br>0.5 M Na <sub>2</sub> S &<br>0.5 M Na <sub>2</sub> SO <sub>3</sub><br>(100 mL)    | 300 W<br>Xe lamp<br>AM 1.5G               | 24.1                                             | 9.3%<br>(420 nm)  | [9]  |
| CdS/ZnS core/shell<br>particles                                    | 5 mg catalyst<br>0.1 M Na <sub>2</sub> S &<br>0.1 M Na <sub>2</sub> SO <sub>3</sub><br>(50 mL)      | 20 W<br>LED<br>$\lambda = 420$ nm         | 16                                               | 8.78%<br>(420 nm) | [10] |
| CdS/ZnS-NiS<br>microstructures                                     | 10 mg catalyst<br>0.35 M Na <sub>2</sub> S &<br>0.25 M Na <sub>2</sub> SO <sub>3</sub><br>(25 mL)   | 225 W<br>Xe lamp<br>$\lambda \geq 320$ nm | 60.44                                            | 23.3%<br>(365 nm) | [11] |
| ZnS-CuS-CdS<br>particles                                           | 100 mg catalyst<br>0.35 M Na <sub>2</sub> S &<br>0.25 M Na <sub>2</sub> SO <sub>3</sub><br>(150 mL) | 150 W<br>Xe lamp<br>AM 1.5G               | 0.84                                             | -                 | [12] |
| Cd <sub>0.5</sub> Zn <sub>0.5</sub> S nano-twins                   | 100 mg catalyst<br>0.35 M Na <sub>2</sub> S &<br>0.25 M Na <sub>2</sub> SO <sub>3</sub><br>(180 mL) | 300 W<br>Xe lamp<br>$\lambda > 430$ nm    | 17.9                                             | 43%<br>(425 nm)   | [13] |

|                                                       |                                                                                                     |                                           |      |                 |           |
|-------------------------------------------------------|-----------------------------------------------------------------------------------------------------|-------------------------------------------|------|-----------------|-----------|
| Cd <sub>0.5</sub> Zn <sub>0.5</sub> S twined nanorods | 100 mg catalyst<br>0.35 M Na <sub>2</sub> S &<br>0.25 M Na <sub>2</sub> SO <sub>3</sub><br>(180 mL) | 300 W<br>Xe lamp<br>$\lambda > 430$ nm    | 25.8 | 62%<br>(425 nm) | [14]      |
| 50-ZnS/CdS NCAs                                       | 20 mg catalyst<br>1.4 M Na <sub>2</sub> S &<br>1.0 M Na <sub>2</sub> SO <sub>3</sub><br>(20 mL)     | 300 W<br>Xe lamp<br>$\lambda \geq 420$ nm | 29.0 | 60%<br>(420 nm) | This work |

**Table S3.** EIS equivalent circuit fitted parameters for the mesoporous CdS and ZnS NCAs and the as-prepared ZnS/CdS materials.

| Sample                    | R <sub>s</sub><br>(Ohm) | C <sub>dl</sub><br>(F)  | R <sub>ct</sub><br>(Ohm) | [x <sup>2</sup> ] <sup>1</sup> |
|---------------------------|-------------------------|-------------------------|--------------------------|--------------------------------|
| CdS NCAs                  | 14.2                    | 63.3 × 10 <sup>-6</sup> | 1312                     | 2.1 × 10 <sup>-4</sup>         |
| 10-ZnS/CdS                | 12.7                    | 24.2 × 10 <sup>-5</sup> | 686                      | 2.3 × 10 <sup>-4</sup>         |
| 30-ZnS/CdS                | 17.4                    | 17.9 × 10 <sup>-5</sup> | 474                      | 4.3 × 10 <sup>-4</sup>         |
| 50-ZnS/CdS                | 12.1                    | 19.5 × 10 <sup>-5</sup> | 285                      | 8.7 × 10 <sup>-4</sup>         |
| 70-ZnS/CdS                | 13.4                    | 76.8 × 10 <sup>-6</sup> | 486                      | 2.0 × 10 <sup>-4</sup>         |
| 90-ZnS/CdS                | 12.3                    | 86.5 × 10 <sup>-6</sup> | 747                      | 4.2 × 10 <sup>-4</sup>         |
| ZnS NCAs                  | 18.0                    | 11.4 × 10 <sup>-5</sup> | 1362                     | 2.5 × 10 <sup>-4</sup>         |
| ZnS/CdS bulk <sup>2</sup> | 9.6                     | 62.5 × 10 <sup>-6</sup> | 1499                     | 10.3 × 10 <sup>-4</sup>        |

<sup>1</sup> In EIS analysis, the fitting error is often expressed using the chi-square metric. Typically, a satisfactory fit corresponds to chi-square values ranging from 10<sup>-2</sup> to 10<sup>-4</sup>. <sup>2</sup> EIS results for the ZnS/CdS bulk reference catalyst (50 wt.% ZnS).

**Table S4.** PL lifetime biexponential decay model fitting parameters and calculated average lifetimes for the mesoporous CdS and 50-ZnS/CdS NCAs, and the ZnS/CdS bulk analogue with 50 wt.% ZnS.

| Catalyst     | A <sub>1</sub><br>(%) | $\tau_1$<br>(ns) | A <sub>2</sub><br>(%) | $\tau_2$<br>(ns) | $\tau_{av}$<br>(ns) |
|--------------|-----------------------|------------------|-----------------------|------------------|---------------------|
| CdS NCAs     | 72.5                  | 0.80 ± 0.006     | 27.5                  | 4.35 ± 0.039     | 3.20 ± 0.017        |
| 50-ZnS/CdS   | 65.0                  | 1.00 ± 0.012     | 35.0                  | 4.73 ± 0.055     | 3.70 ± 0.025        |
| ZnS/CdS bulk | 68.5                  | 0.70 ± 0.005     | 31.5                  | 4.08 ± 0.026     | 3.16 ± 0.011        |

<sup>1</sup>The average lifetime ( $\tau_{av}$ ) was calculated by the equation:  $\tau_{av} = (\sum_i A_i \tau_i^2) / (\sum_i A_i \tau_i)$  (i = 1, 2).

## Supporting Figures

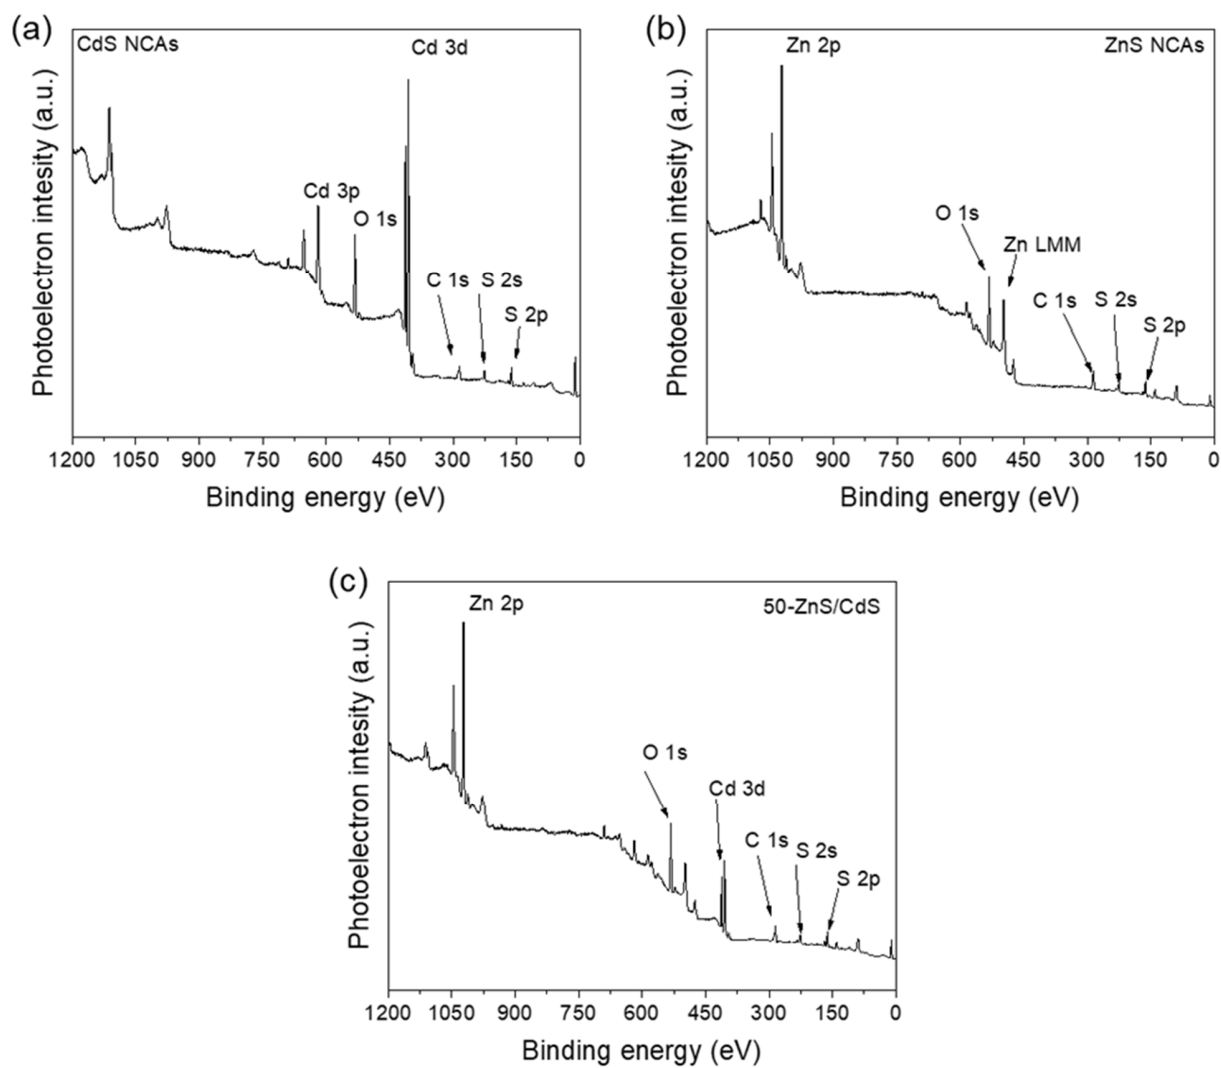

**Figure S1.** Typical XPS survey spectra of CdS, ZnS and 50-ZnS/CdS NCAs showing the presence of Cd, Zn and S, from the constituent NCs and C and O from adsorbed molecules.

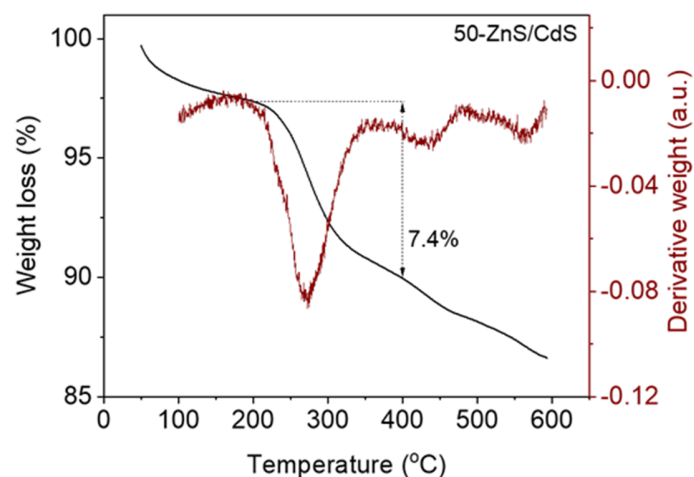

**Figure S2.** Example of TGA profile for the mesoporous (black line) 50-ZnS/CdS nanocomposite obtained after three cycles of ethanol/water washing process. The weight loss in this sample indicated by the corresponding differential thermogravimetric (DTG) curve (red line) is attributed to the decomposition of organic matter.

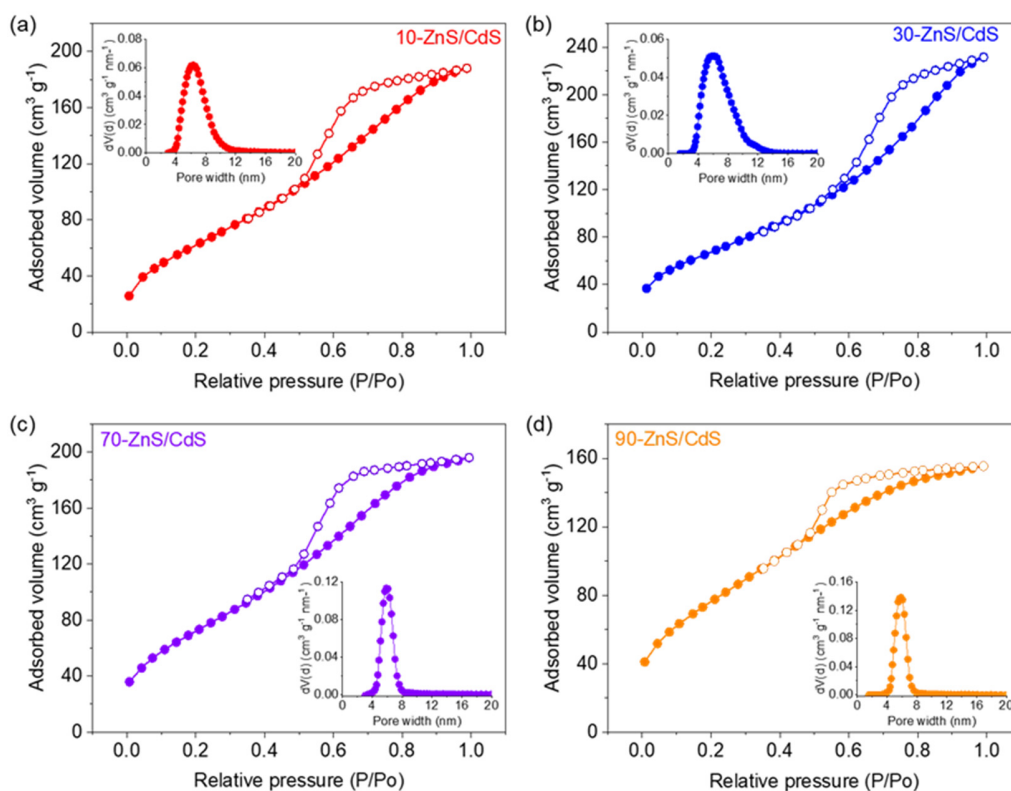

**Figure S3.** Nitrogen adsorption (filled cycles) and desorption (open cycles) isotherms at  $-196^{\circ}\text{C}$  for the mesoporous ZnS/CdS nanocomposites featuring different ZnS loadings: (a) 10 wt.%, (b) 30 wt.%, (c) 70 wt.%, and (d) 90 wt.%. Insets: The corresponding NLDFT pore size distributions calculated from the adsorption branch of isotherms.

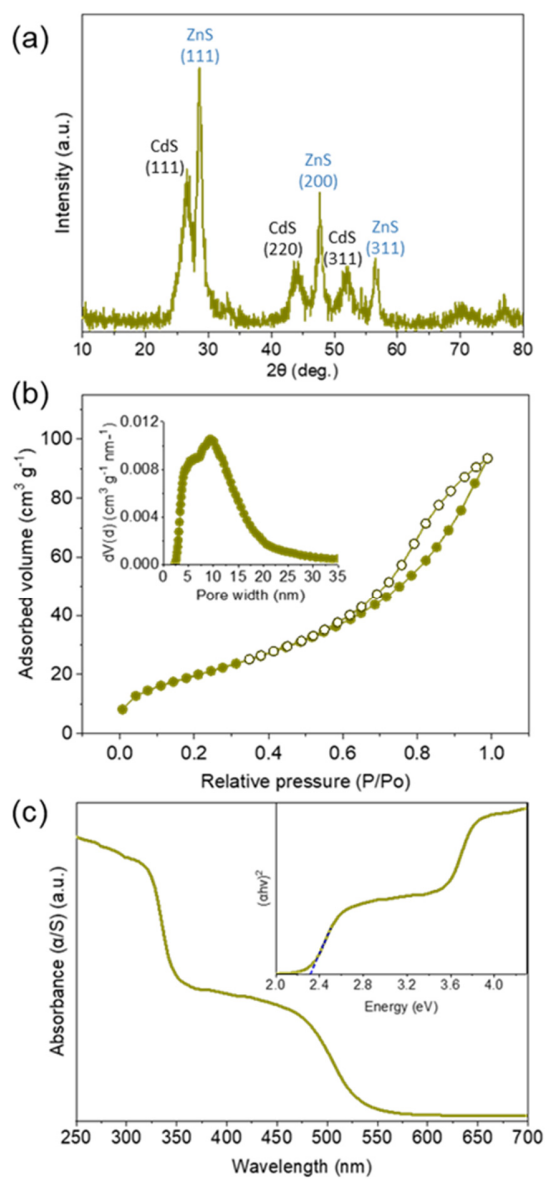

**Figure S4.** (a) XRD pattern, (b)  $N_2$  adsorption (filled cycles) and desorption (open cycles) isotherms at  $-196^\circ\text{C}$  and the corresponding NLDFT pore-size distribution plot (inset), and (d) optical absorption spectrum and Tauc plot (inset) of the reference ZnS/CdS bulk catalyst with 50 wt.% ZnS content.

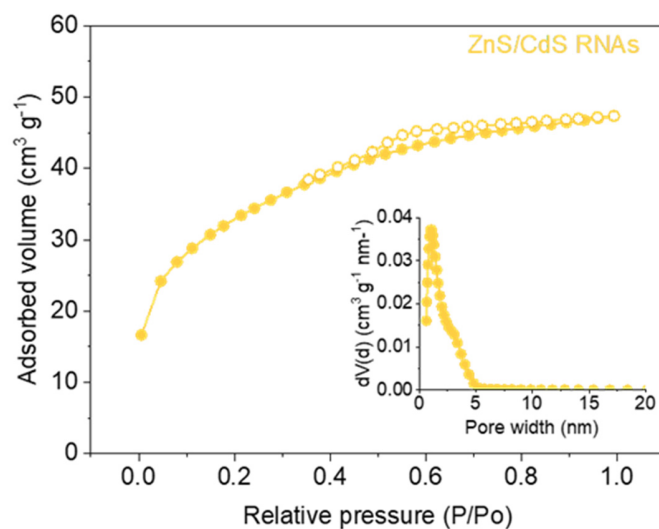

**Figure S5.**  $N_2$  adsorption (filled cycles) and desorption (open cycles) isotherms at  $-196^\circ\text{C}$  and the corresponding NLDFT pore-size distribution plot (inset) of the reference ZnS/CdS RNAs catalyst with 50 wt.% ZnS content. Analysis of the adsorption data with the BET method gives a surface area of  $114 \text{ m}^2 \text{g}^{-1}$  and total pore volume of  $0.07 \text{ cm}^3 \text{g}^{-1}$ . The NLDFT pore size distribution calculated from the adsorption branch of isotherms indicates a pore size of  $\sim 1.5 \text{ nm}$ .

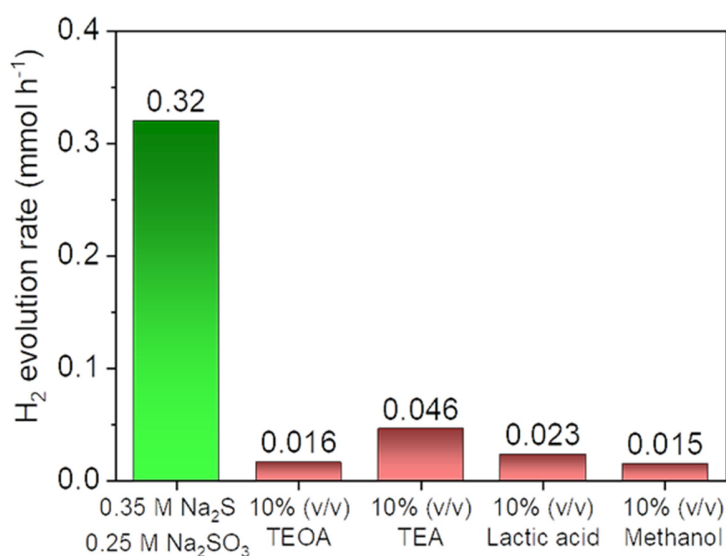

**Figure S6.** Photocatalytic  $H_2$  evolution rates (averaged over 3-h reaction period) for the mesoporous 50-ZnS/CdS catalyst using different sacrificial reagents: 0.35 M  $\text{Na}_2\text{S}$  and 0.25 M  $\text{Na}_2\text{SO}_3$ , triethanolamine (TEOA, 10% v/v), triethylamine (TEA, 10% v/v), lactic acid (10% v/v) and methanol (10% v/v). All photocatalytic reactions were performed as follows: 20 mg of catalyst dispersed in a 20 mL aqueous solution containing the sacrificial reagent; 300 W Xe light irradiation with a long-pass cut-off filter allowing  $\lambda \geq 420 \text{ nm}$ .



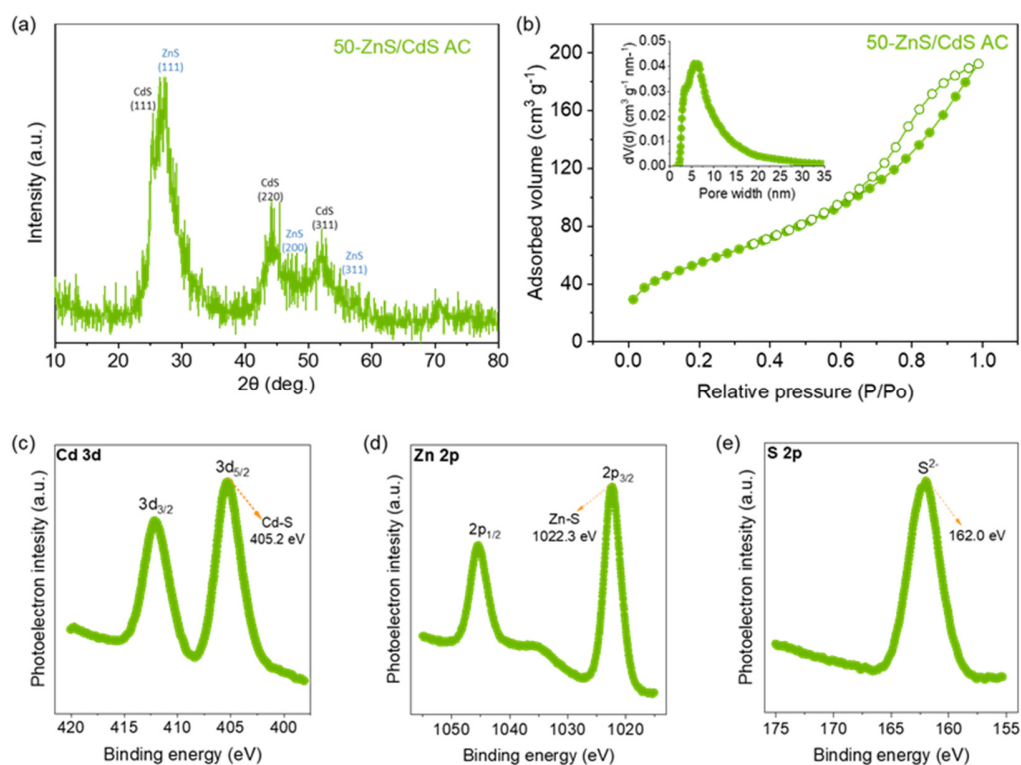

**Figure S7.** (a) XRD pattern, (b)  $N_2$  adsorption (filled cycles) and desorption (open cycles) isotherms at  $-196^\circ\text{C}$  (inset: the corresponding NLDFT pore-size distribution plot), and (c-e) typical XPS spectra of the (c) Cd 3d, (d) Zn 2p, and (e) S 2p regions of the 50-ZnS/CdS catalyst retrieved after 24-h of photocatalytic reaction.

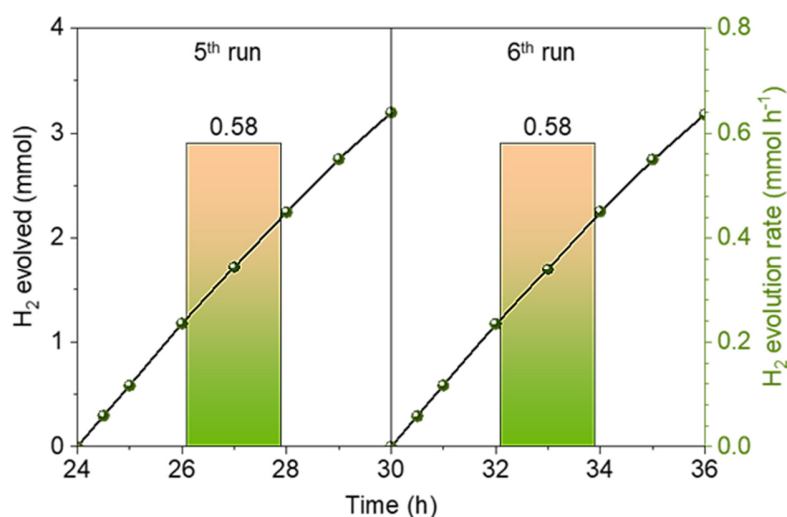

**Figure S8.** 5<sup>th</sup> and 6<sup>th</sup> run of the photocatalytic recycling study of the 50-ZnS/CdS catalyst in a 1.4 M  $\text{Na}_2\text{S}$  and 1.0 M  $\text{Na}_2\text{SO}_3$  aqueous electrolyte. All the  $H_2$ -evolution rates obtained as an average over the initial 3-h reaction period. Reaction conditions: 20 mg catalyst dispersed in 20 mL of fresh electrolyte solution, 300 W Xenon light irradiation with a UV cutoff filter ( $\lambda \geq 420 \text{ nm}$ ),  $T = 20 \pm 2^\circ\text{C}$ .

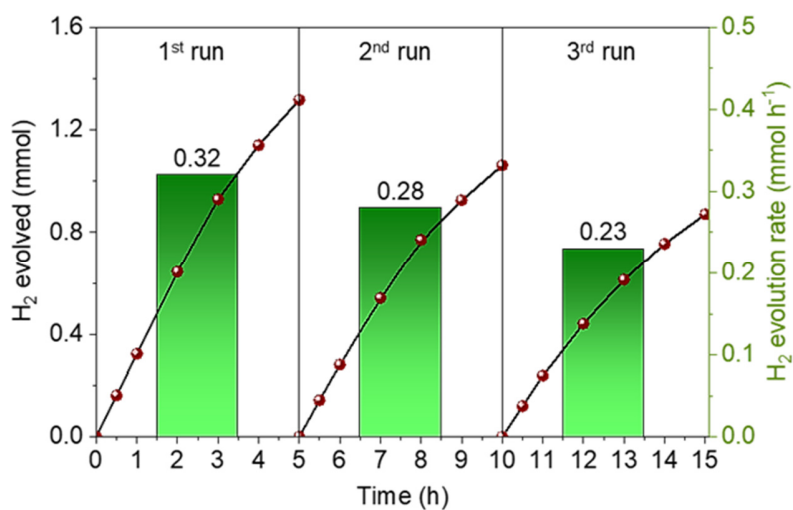

**Figure S9.** Photocatalytic recycling tests of the 50-ZnS/CdS catalyst in a 0.35 M Na<sub>2</sub>S and 0.25 M Na<sub>2</sub>SO<sub>3</sub> aqueous electrolyte. All the H<sub>2</sub>-evolution rates obtained as an average over the initial 3-h reaction period. Reaction conditions: 20 mg catalyst dispersed in 20 mL of fresh electrolyte solution, 300 W Xenon light irradiation with a UV cutoff filter ( $\lambda \geq 420$  nm),  $T = 20 \pm 2$  °C.

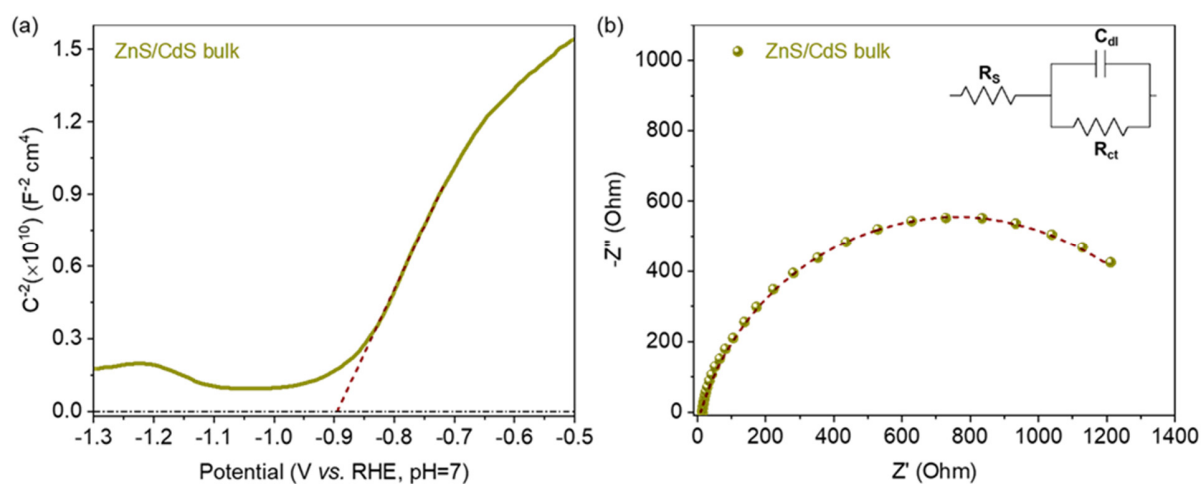

**Figure S10.** (a) Mott-Schottky plot and (b) EIS Nyquist spectrum (inset: equivalent circuit model) for the reference ZnS/CdS bulk catalyst with 50 wt.% ZnS content.

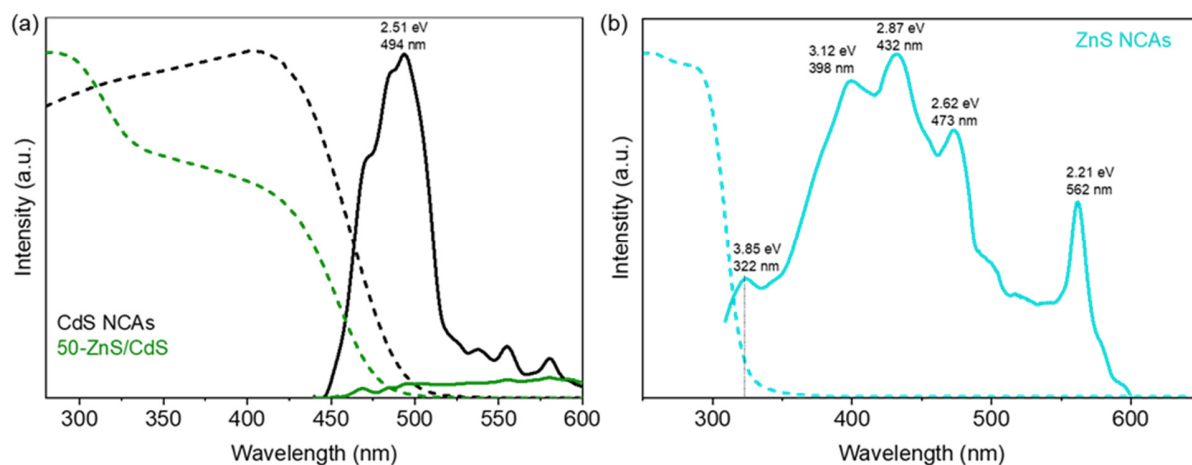

**Figure S11.** Room-temperature PL emission spectra (solid lines) of (a) mesoporous CdS and 50-ZnS/CdS NCAs (excitation wavelength 380 nm) and (b) mesoporous ZnS NCAs (excitation wavelength 280 nm). The dashed lines correspond to the UV-Vis/NIR absorption spectra of the respective samples.

## References

1. Li, K.; Chen, R.; Li, S.L.; Han, M.; Xie, S.L.; Bao, J.C.; Dai, Z.H.; Lan, Y.Q. Self-Assembly of a Mesoporous ZnS/Mediating Interface/CdS Heterostructure with Enhanced Visible-Light Hydrogen-Production Activity and Excellent Stability. *Chem Sci* **2015**, *6*, 5263–5268, doi:10.1039/C5SC01586C.
2. Jiang, D.; Sun, Z.; Jia, H.; Lu, D.; Du, P. A Cocatalyst-Free CdS Nanorod/ZnS Nanoparticle Composite for High-Performance Visible-Light-Driven Hydrogen Production from Water. *J Mater Chem A Mater* **2015**, *4*, 675–683, doi:10.1039/C5TA07420G.
3. Wang, X.; Li, X. yan Heterostruture CdS/ZnS Nanoparticles as a Visible Light-Driven Photocatalyst for Hydrogen Generation from Water. *Int J Green Energy* **2016**, *13*, 1201–1208, doi:10.1080/15435075.2016.1175349/SUPPL\_FILE/LJGE\_A\_1175349\_SM6365.DOC.
4. Wang, J.; Wang, Z.; Li, L.; Chen, J.; Zheng, J.; Jia, S.; Zhu, Z. Structure-Controlled CdS(0D, 1D, 2D) Embedded onto 2D ZnS Porous Nanosheets for Highly Efficient Photocatalytic Hydrogen Generation. *RSC Adv* **2017**, *7*, 24864–24869, doi:10.1039/C7RA02565C.
5. Kundu, J.; Satpathy, B.K.; Pradhan, D. Composition-Controlled CdS/ZnS Heterostructure Nanocomposites for Efficient Visible Light Photocatalytic Hydrogen Generation. *Ind Eng Chem Res* **2019**, *58*, 22709–22717, doi:10.1021/ACS.IECR.9B03764/ASSET/IMAGES/LARGE/IE9B03764\_0001.JPEG.
6. Zhu, Y.; Jiang, X.; Lin, L.; Wang, S.; Chen, C. Fabrication of ZnS/CdS Heterojunction by Using Bimetallic MOFs Template for Photocatalytic Hydrogen Generation. *Chem Res Chin Univ* **2020**, *36*, 1032–1038, doi:10.1007/S40242-020-0083-5/METRICS.
7. Huang, L.; Wang, X.; Yang, J.; Liu, G.; Han, J.; Li, C. Dual Cocatalysts Loaded Type i CdS/ZnS Core/Shell Nanocrystals as Effective and Stable Photocatalysts for H<sub>2</sub> Evolution. *Journal of Physical Chemistry C* **2013**, *117*, 11584–11591, doi:10.1021/JP400010Z/SUPPL\_FILE/JP400010Z\_SI\_001.PDF.
8. Xie, Y.P.; Yu, Z.B.; Liu, G.; Ma, X.L.; Cheng, H.M. CdS–Mesoporous ZnS Core–Shell Particles for Efficient and Stable Photocatalytic Hydrogen Evolution under Visible Light. *Energy Environ Sci* **2014**, *7*, 1895–1901, doi:10.1039/C3EE43750G.
9. Lin, Y.; Zhang, Q.; Li, Y.; Liu, Y.; Xu, K.; Huang, J.; Zhou, X.; Peng, F. The Evolution from a Typical Type-I CdS/ZnS to Type-II and Z-Scheme Hybrid Structure for Efficient and Stable Hydrogen Production under Visible Light. *ACS Sustain Chem Eng* **2020**, *8*, 4537–4546, doi:10.1021/ACSSUSCHEMENG.0C00101/ASSET/IMAGES/LARGE/SC0C00101\_0003.JPEG.
10. Reddy, N.L.; Rao, V.N.; Kumari, M.M.; Sathish, M.; Muthukonda Venkatakrishnan, S. Development of High Quantum Efficiency CdS/ZnS Core/Shell Structured Photocatalyst for the Enhanced Solar Hydrogen Evolution. *Int J Hydrogen Energy* **2018**, *43*, 22315–22328, doi:10.1016/J.IJHYDENE.2018.10.054.
11. Ma, D.; Shi, J.W.; Sun, L.; Sun, Y.; Mao, S.; Pu, Z.; He, C.; Zhang, Y.; He, D.; Wang, H.; et al. Knack behind the High Performance CdS/ZnS–NiS Nanocomposites: Optimizing Synergistic Effect

- between Cocatalyst and Heterostructure for Boosting Hydrogen Evolution. *Chemical Engineering Journal* **2022**, 431, 133446, doi:10.1016/J.CEJ.2021.133446.
12. Hong, E.; Kim, D.; Kim, J.H. Heterostructured Metal Sulfide (ZnS–CuS–CdS) Photocatalyst for High Electron Utilization in Hydrogen Production from Solar Water Splitting. *Journal of Industrial and Engineering Chemistry* **2014**, 20, 3869–3874, doi:10.1016/J.JIEC.2013.12.092.
  13. Liu, M.; Wang, L.; Lu, G.; Yao, X.; Guo, L. Twins in Cd<sub>1-x</sub>Zn<sub>x</sub>S Solid Solution: Highly Efficient Photocatalyst for Hydrogen Generation from Water. *Energy Environ Sci* **2011**, 4, 1372–1378, doi:10.1039/C0EE00604A.
  14. Liu, M.; Jing, D.; Zhou, Z.; Guo, L. Twin-Induced One-Dimensional Homo Junctions Yield High Quantum Efficiency for Solar Hydrogen Generation. *Nature Communications* **2013**, 4, 1–8, doi:10.1038/ncomms3278.
